# Supplementary material
Source: publisher figshare collection journal article supplement (https://karger.figshare.com/ndownloader/files/13676021)
Supplement: Supplementary file 1 [file 13676021]

## Supplementary Material

# **MicroRNA-29a-3p, Up-Regulated in Human Gastric Cells and Tissues with *H.Pylori* Infection, Promotes the Migration of GES-1 Cells via A20-Mediated EMT Pathway**

Fengying Sun<sup>a,b</sup> Ying Ni<sup>a</sup> Hong Zhu<sup>a</sup> Jian Fang<sup>c</sup> Hua Wang<sup>a</sup> Jinxuan Xia<sup>a</sup>  
Fangfang Ding<sup>a</sup> HongxingShen<sup>a</sup> Shihe Shao<sup>a</sup>

<sup>1</sup>School Of Medicine, Jiangsu University, 301 Xuefu Road, Zhenjiang, Jiangsu, <sup>2</sup>Department of Clinical Laboratory, The Second People's Hospital of Wuhu, Anhui, <sup>3</sup>Department of Transfusion, The First Affiliated Hospital of Anhui Medical University, Hefei, China

**Supplementary Table S1. Clinical specimens information for qRT-PCR**

| Number | Age | Gender | Histopathology                                 | <i>Helicobacter pylori</i> |
|--------|-----|--------|------------------------------------------------|----------------------------|
| 1      | 40  | F      | Chronic erosive gastritis                      | +                          |
| 2      | 37  | M      | Duodenal ulcer (active)                        | +                          |
| 3      | 46  | M      | Erosive antral gastritis (mild)                | +                          |
| 4      | 46  | M      | Erosive antral gastritis (mild)                | +                          |
| 5      | 38  | M      | Erosive antral gastritis (mild)                | +                          |
| 6      | 56  | F      | Bile reflux gastritis                          | +                          |
| 7      | 51  | F      | Duodenal ulcer                                 | +                          |
| 8      | 47  | M      | Erosive gastritis (moderate)                   | +                          |
| 9      | 54  | M      | Erosive antral gastritis (moderate)            | +                          |
| 10     | 57  | F      | Erosive antral gastritis (mild)                | +                          |
| 11     | 24  | F      | Chronic superficial gastritis                  | +                          |
| 12     | 63  | M      | Gastric ulcer                                  | +                          |
| 13     | 43  | M      | Erosive antral gastritis (moderate)            | +                          |
| 14     | 35  | F      | Chronic superficial gastritis; duodenitis      | +                          |
| 15     | 23  | M      | Erosive antral gastritis (moderate)            | +                          |
| 16     | 66  | M      | Chronic active gastritis                       | +                          |
| 17     | 20  | M      | Chronic superficial gastritis with bile reflux | -                          |
| 18     | 40  | M      | Chronic active gastritis (moderate)            | +                          |
| 19     | 69  | F      | Normal gastric mucosa tissues                  | -                          |
| 20     | 71  | M      | Chronic active gastritis (moderate)            | -                          |
| 21     | 36  | M      | Chronic superficial gastritis                  | -                          |
| 22     | 44  | F      | Chronic gastritis (mild)                       | -                          |
| 23     | 61  | M      | Chronic active gastritis (mild)                | -                          |
| 24     | 42  | M      | Chronic superficial gastritis                  | +                          |
| 25     | 52  | M      | Chronic superficial gastritis (mild)           | -                          |
| 26     | 48  | M      | Chronic gastritis                              | -                          |
| 27     | 45  | M      | Chronic gastritis (mild)                       | -                          |
| 28     | 63  | M      | Chronic gastritis                              | -                          |
| 29     | 65  | M      | Chronic active gastritis (moderate)            | +                          |
| 30     | 37  | M      | Chronic superficial gastritis                  | -                          |
| 31     | 45  | M      | Chronic superficial gastritis (mild)           | -                          |
| 32     | 60  | F      | Chronic superficial gastritis                  | -                          |
| 33     | 39  | F      | Chronic active gastritis                       | +                          |
| 34     | 26  | F      | Normal gastric mucosa tissues                  | -                          |
| 35     | 58  | F      | Normal gastric mucosa tissues                  | -                          |
| 36     | 51  | F      | Chronic superficial gastritis                  | -                          |
| 37     | 51  | M      | Chronic active antral gastritis (moderate)     | -                          |
| 38     | 54  | F      | Chronic antral gastritis (mild)                | -                          |
| 39     | 26  | F      | Chronic superficial gastritis                  | +                          |
| 40     | 53  | F      | Chronic superficial gastritis                  | +                          |

|    |    |   |                                                                |   |
|----|----|---|----------------------------------------------------------------|---|
| 41 | 47 | M | Chronic superficial gastritis                                  | + |
| 42 | 47 | M | Normal gastric mucosa tissues                                  | - |
| 43 | 72 | M | Normal gastric mucosa tissues                                  | - |
| 44 | 55 | F | Chronic antral gastritis (moderate) with intestinal metaplasia | - |
| 45 | 68 | F | Chronic superficial gastritis (mild)                           | + |
| 46 | 38 | M | Chronic active gastritis (mild) with hemorrhage                | - |
| 47 | 48 | F | Bile reflux gastritis                                          | + |
| 48 | 61 | F | Bile reflux gastritis                                          | - |
| 49 | 60 | F | Chronic superficial gastritis                                  | - |
| 50 | 59 | F | Erosive antral gastritis (mild)                                | - |
| 51 | 23 | F | Chronic superficial gastritis                                  | - |
| 52 | 48 | F | Erosive antral gastritis (mild)                                | - |
| 53 | 71 | M | Bile reflux gastritis                                          | - |
| 54 | 47 | M | Normal gastric mucosa tissues                                  | - |
| 55 | 65 | F | Chronic superficial gastritis                                  | - |
| 56 | 43 | F | Erosive antral gastritis (mild)                                | + |
| 57 | 38 | F | Normal gastric mucosa tissues                                  | - |
| 58 | 41 | F | Normal gastric mucosa tissues                                  | - |
| 59 | 19 | M | Normal gastric mucosa tissues                                  | - |
| 60 | 50 | F | Normal gastric mucosa tissues                                  | - |
| 61 | 60 | F | Bile reflux gastritis                                          | - |
| 62 | 29 | F | Erosive antral gastritis (mild)                                | + |
| 63 | 52 | F | Chronic superficial gastritis                                  | - |
| 64 | 61 | F | Esophagitis                                                    | - |
| 65 | 32 | M | Chronic superficial gastritis                                  | - |
| 66 | 45 | F | Chronic superficial gastritis                                  | + |
| 67 | 67 | F | Normal gastric mucosa tissues                                  | - |
| 68 | 42 | F | Chronic superficial gastritis                                  | - |
| 69 | 62 | F | Erosive antral gastritis                                       | + |
| 70 | 36 | M | Normal gastric mucosa tissues                                  | - |
| 71 | 35 | M | Erosive antral gastritis (mild)                                | - |
| 72 | 50 | M | Gastric ulcer                                                  | - |
| 73 | 28 | F | Chronic superficial gastritis                                  | - |
| 74 | 59 | M | Chronic superficial gastritis                                  | - |
| 75 | 35 | F | Normal gastric mucosa tissues                                  | - |
| 76 | 56 | F | Normal gastric mucosa tissues                                  | - |
| 77 | 33 | M | Normal gastric mucosa tissues                                  | - |
| 78 | 69 | M | Chronic atrophic erosive gastritis                             | - |
| 79 | 26 | M | Erosive antral gastritis (mild)                                | + |
| 80 | 61 | M | Gastric ulcer (multi-focal)                                    | + |
| 81 | 23 | M | Duodenal ulcer                                                 | + |
| 82 | 59 | M | Chronic atrophic gastritis                                     | + |
| 83 | 20 | M | Duodenal ulcer (active)                                        | + |

|    |    |   |                               |   |
|----|----|---|-------------------------------|---|
| 84 | 58 | F | Normal gastric mucosa tissues | - |
| 85 | 64 | F | Gastric ulcer                 | - |
| 86 | 50 | F | Erosive gastritis             | + |
| 87 | 29 | F | Chronic superficial gastritis | + |
| 88 | 60 | M | Hemorrhagic erosive gastritis | - |
| 89 | 38 | M | Gastric ulcer; duodenal ulcer | + |
| 90 | 21 | F | Duodenal ulcer                | + |
| 91 | 35 | F | Duodenal ulcer (active)       | + |
| 92 | 39 | M | Erosive antral gastritis      | + |
| 93 | 50 | M | Chronic erosive gastritis     | + |
| 94 | 38 | M | Duodenal ulcer (active)       | + |
| 95 | 48 | M | Chronic erosive gastritis     | + |
| 96 | 51 | M | Chronic erosive gastritis     | + |
| 97 | 52 | F | Gastric ulcer; duodenal ulcer | + |
| 98 | 55 | F | Erosive antral gastritis      | + |

**Supplementary Table S2. Clinical specimens information for IHC**

| Number | Age | Gender | Histopathology                                 | <i>Helicobacter pylori</i> |
|--------|-----|--------|------------------------------------------------|----------------------------|
| 1      | 40  | F      | Chronic erosive gastritis                      | +                          |
| 2      | 37  | M      | Duodenal ulcer (active)                        | +                          |
| 3      | 46  | M      | Erosive antral gastritis (mild)                | +                          |
| 4      | 46  | M      | Erosive antral gastritis (mild)                | +                          |
| 5      | 38  | M      | Erosive antral gastritis (mild)                | +                          |
| 6      | 35  | F      | Chronic superficial gastritis; duodenitis      | +                          |
| 7      | 23  | M      | Erosive antral gastritis (moderate)            | +                          |
| 8      | 66  | M      | Chronic active gastritis                       | +                          |
| 9      | 20  | M      | Chronic superficial gastritis with bile reflux | -                          |
| 10     | 40  | M      | Chronic active gastritis (moderate)            | +                          |
| 11     | 69  | F      | Normal gastric mucosa tissues                  | -                          |
| 12     | 71  | M      | Chronic active gastritis (moderate)            | -                          |
| 13     | 36  | M      | Chronic superficial gastritis                  | -                          |
| 14     | 44  | F      | Chronic gastritis (mild)                       | -                          |
| 15     | 61  | M      | Chronic active gastritis (mild)                | -                          |
| 16     | 42  | M      | Chronic superficial gastritis                  | +                          |
| 17     | 52  | M      | Chronic superficial gastritis (mild)           | -                          |
| 18     | 48  | M      | Chronic gastritis                              | -                          |
| 19     | 45  | M      | Chronic gastritis (mild)                       | -                          |
| 20     | 63  | M      | Chronic gastritis                              | -                          |
| 21     | 65  | M      | Chronic active gastritis (moderate)            | +                          |
| 22     | 37  | M      | Chronic superficial gastritis                  | -                          |
| 23     | 45  | M      | Chronic superficial gastritis (mild)           | -                          |

|    |    |   |                                 |   |
|----|----|---|---------------------------------|---|
| 24 | 60 | F | Chronic superficial gastritis   | - |
| 25 | 39 | F | Chronic active gastritis        | + |
| 26 | 47 | M | Normal gastric mucosa tissues   | - |
| 27 | 65 | F | Chronic superficial gastritis   | - |
| 28 | 50 | F | Normal gastric mucosa tissues   | - |
| 29 | 60 | F | Bile reflux gastritis           | - |
| 30 | 29 | F | Erosive antral gastritis (mild) | + |
| 31 | 32 | M | Chronic superficial gastritis   | - |
| 32 | 45 | F | Chronic superficial gastritis   | + |
| 33 | 67 | F | Normal gastric mucosa tissues   | - |
| 34 | 42 | F | Chronic superficial gastritis   | - |
| 35 | 62 | F | Erosive antral gastritis        | + |
| 36 | 36 | M | Normal gastric mucosa tissues   | - |
| 37 | 23 | M | Duodenal ulcer                  | + |
| 38 | 59 | M | Chronic atrophic gastritis      | + |
| 39 | 20 | M | Duodenal ulcer (active)         | + |
| 40 | 58 | F | Normal gastric mucosa tissues   | - |
| 41 | 64 | F | Gastric ulcer                   | - |
| 42 | 50 | F | Erosive gastritis               | + |
| 43 | 29 | F | Chronic superficial gastritis   | + |
| 44 | 39 | M | Erosive antral gastritis        | + |
| 45 | 50 | M | Chronic erosive gastritis       | + |
| 46 | 38 | M | Duodenal ulcer (active)         | + |
| 47 | 48 | M | Chronic erosive gastritis       | + |

## Supplementary Figure S1. Medical ethics review report

Note: Medical ethics review report was Chinese language in China. We translated the the Medical ethics review report of Chinese language into English.

**常州市第二人民医院**

---

**医学伦理学审查报告**

我院拟开展“幽门螺杆菌感染的人胃黏膜细胞和胃黏膜组织中长非编码 RNA 表达谱的研究”科研工作。该项目采用人胃黏膜组织作为实验材料，我院医学伦理委员会对该项目相关医学伦理学问题进行了审查。

**项目信息：**  
研究项目名称：“幽门螺杆菌感染的人胃黏膜细胞和胃黏膜组织中长非编码 RNA 表达谱的研究”  
承担单位：常州市第二人民医院      项目负责人：朱 虹  
职称：      研究起止日期：2014 年 12 月至 2015 年 5 月

**涉及人体研究的主要内容：**  
在消化内镜镜检查中通过病理活检钳采集胃窦部的黏膜组织，进行临床常规病理诊断、快速脲酶试验，并将剩余的组织标本进行总 RNA 的提取，逆转录为 cDNA 后，通过实时荧光定量 PCR (RT-PCR) 对长非编码 RNA 的表达水平进行相对定量，进而研究长非编码 RNA 在幽门螺杆菌感染阳性标本中的异常表达情况。

**审查评议意见：**  
经我院医学伦理委员会审议，该研究的实验设计和实施方案充分考虑了安全性和公平性原则，研究内容不构成对受试者的伤害和风险，受试者的招募将完全基于自愿和知情同意原则，并尽最大限度保护受试者隐私，研究内容和结果不存在利益冲突。

**结论：**  
该研究中，受试者权力和利益得到充分保护，对受试者不存在潜在风险，同意该项研究的现场工作按计划进行。

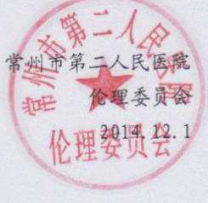

## **The Second People's Hospital of Changzhou**

### **Medical ethics review report**

The Second People's Hospital of Changzhou will carry out the "Microarray analysis of Long non-codingRNA expression profiles in human gastriccells and tissues with *Helicobacter pylori* Infection" research work. The project used the gastric mucosal tissue as experimental materials. The project was reviewed by the medical ethics committee of The Second People's Hospital of Changzhou.

Project information:

The name of research project: Microarray analysis of Long non-codingRNAexpression profiles in human gastriccells and tissues with *Helicobacter pylori* infection.

Responsible unit: The Second People's Hospital of Changzhou

The project leader: Zhu Hong

Study date: 2014/12—2015/05

The main content of research:

The gastric mucosa specimens were harvested by digestive endoscopy, to carry out clinical pathological diagnosis and Rapid Urease Test at the Digestive Endoscopy center of The Second People's Hospital of Changzhou. Remaining specimens were used for RNA extraction and then transcribed into cDNA. Subsequently, quantitative real-time PCR was performed with the cDNA to analysis the relative expression of non-long coding RNA in gastric mucosa specimens.

Review opinions:

The experimental design and implementation scheme of the study give full consideration to the safety and fairness principle. The research content does not cause harm and risk to the subjects. The subjects' recruitment will be entirely based on voluntary and the fairness principle. We try our best to protect the privacy of subjects. There is no conflict of interest in research contents and

results.

Conclusion:

In this study, there is no potential risk to subjects. The rights and interests of subjects are fully protected. we agreed to this study.

Ethics committee of The Second

People's Hospital of Changzhou
